# Supplementary material for: Elucidation of the heme active site electronic structure affecting the unprecedented nitrite dismutase activity of the ferriheme b proteins, the nitrophorins
Source: PubMed Central journal article supplement (PMC6020753; doi:10.1039/c6sc01019a), 2016-04-25
Supplement: SC-007-C6SC01019A-s001.pdf [file SC-007-C6SC01019A-s001.pdf]

## ELECTRONIC SUPPLEMENTARY INFORMATION

# **Elucidation of the heme active site electronic structure affecting the unprecedented nitrite dismutase activity of the ferriheme *b* proteins, the nitrophorins**

Chunmao He,\* Hideaki Ogata, and Wolfgang Lubitz\*

Max Planck Institute for Chemical Energy Conversion, Stiftstrasse 34-36, D-45470, Mülheim an der Ruhr,  
Germany

---

\*To whom correspondence should be addressed.

C.H. (chunmao82@gmail.com)

W.L. (wolfgang.lubitz@cec.mpg.de)

**Fig. S1** The d orbital splitting patterns of Fe(III) low spin complexes.<sup>a</sup>

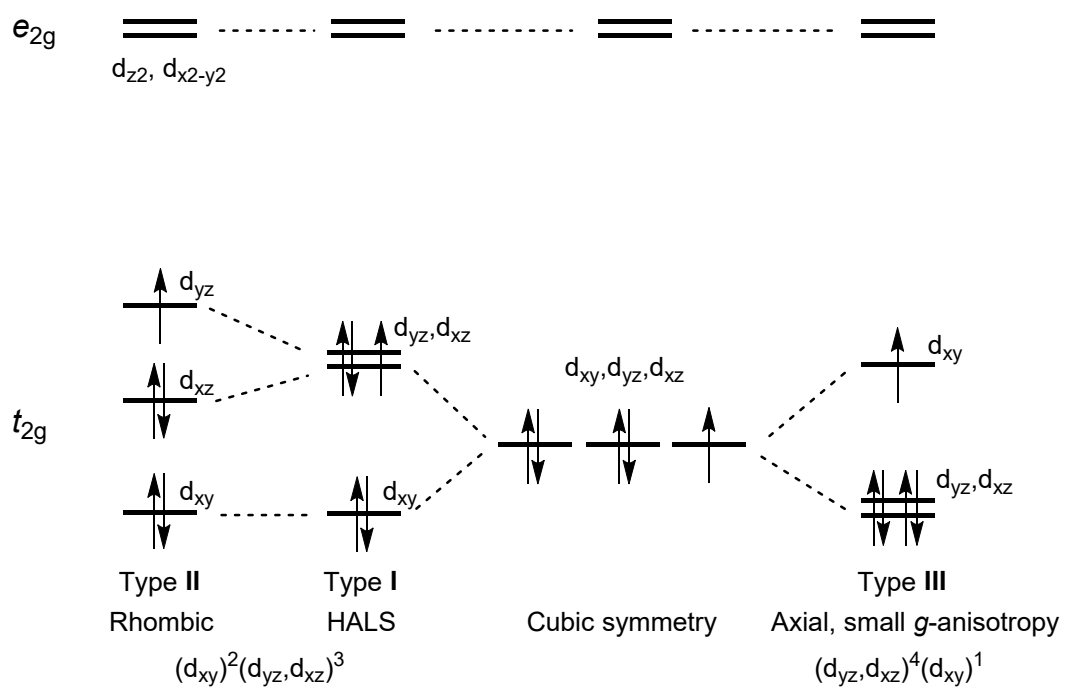

<sup>a</sup>Adapted from 1), M. Nakamura, *Coord. Chem. Rev.* 2006, **250**, 2271 and 2), G. Zoppellaro, *et al. J. Am. Chem. Soc.* 2008, **130**, 15348.

**Fig. S2** Simulation of the EPR spectra of the nitrite complexes of nitrophorins at pH 7.4 unless noted otherwise (showing only the high field region; the residual high-spin signal is indicated by an asterisk). The simulated rhombic signal is shown in either blue or green and the HALS signal is shown in red; the  $g$ -values used for the simulations are summarized in the table to the right.

**(A) NP4(L130R)[NO<sub>2</sub><sup>-</sup>]**

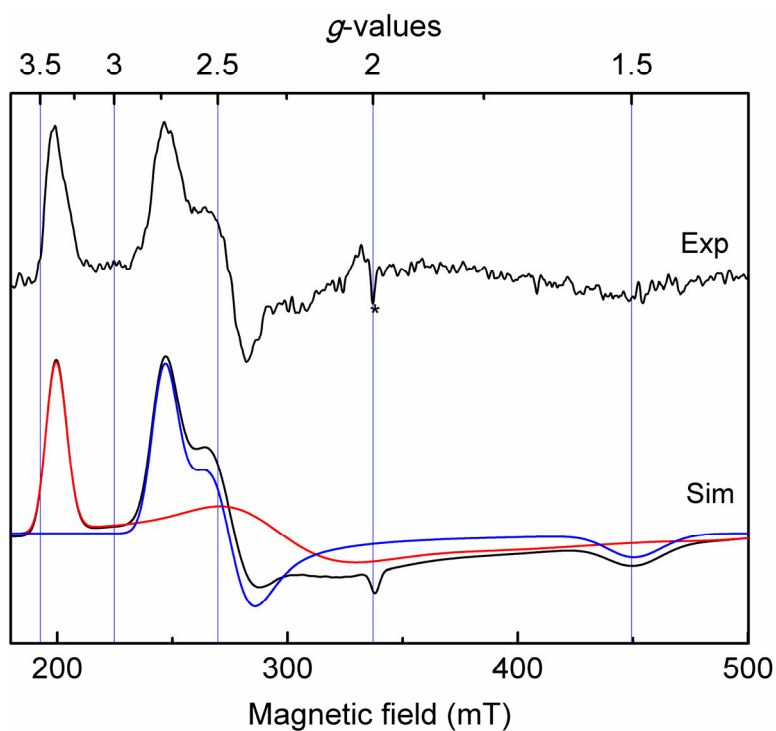

| HALS  |       |       | LS2   |       |       |
|-------|-------|-------|-------|-------|-------|
| $g_1$ | $g_2$ | $g_3$ | $g_1$ | $g_2$ | $g_3$ |
| 3.32  | 2.20  | 0.60  | 2.70  | 2.42  | 1.49  |

**(B) NP4(D30N)[NO<sub>2</sub><sup>-</sup>]**

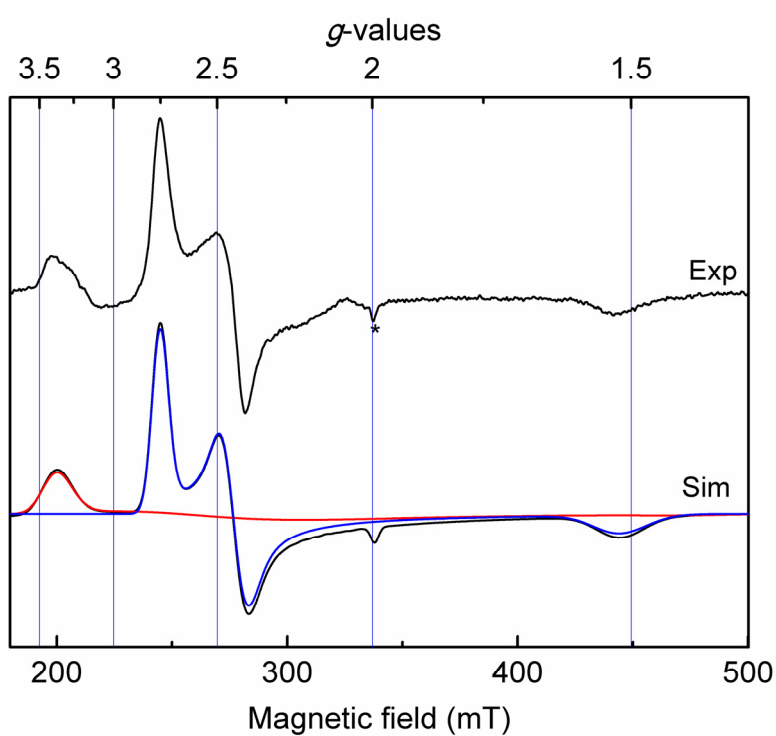

| HALS  |       |       | LS2   |       |       |
|-------|-------|-------|-------|-------|-------|
| $g_1$ | $g_2$ | $g_3$ | $g_1$ | $g_2$ | $g_3$ |
| 3.30  | 2.05  | 0.62  | 2.72  | 2.41  | 1.51  |

(C) NP4[NO<sub>2</sub><sup>-</sup>]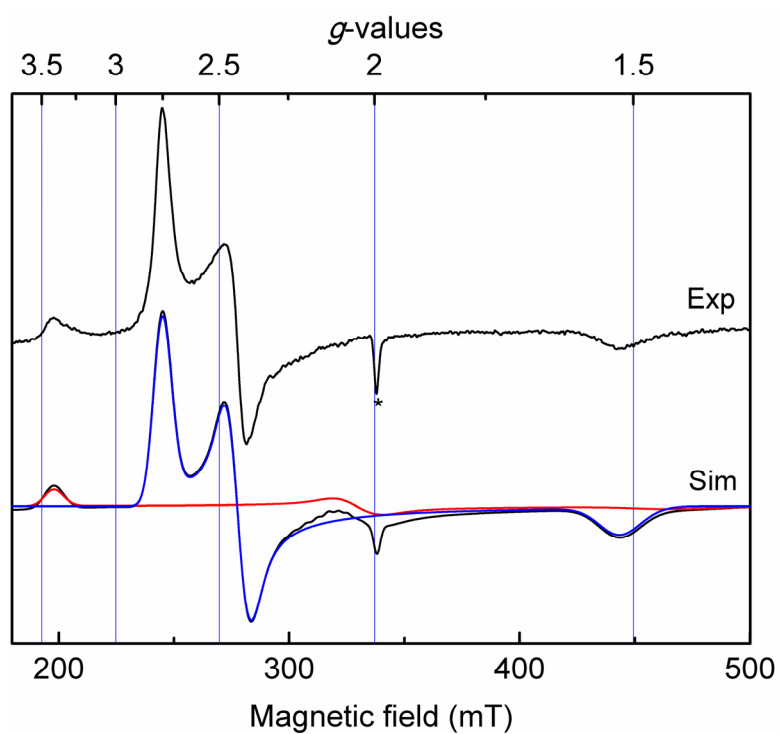

| HALS  |       |       | LS2   |       |       |
|-------|-------|-------|-------|-------|-------|
| $g_1$ | $g_2$ | $g_3$ | $g_1$ | $g_2$ | $g_3$ |
| 3.38  | 2.03  | 0.62  | 2.74  | 2.42  | 1.51  |

(D) NP1[NO<sub>2</sub><sup>-</sup>]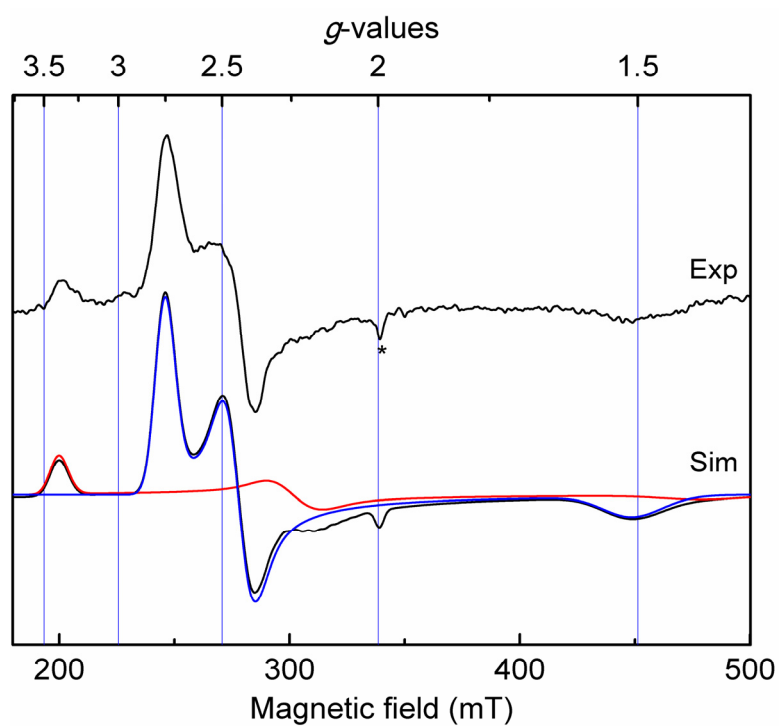

| HALS  |       |       | LS2   |       |       |
|-------|-------|-------|-------|-------|-------|
| $g_1$ | $g_2$ | $g_3$ | $g_1$ | $g_2$ | $g_3$ |
| 3.33  | 2.22  | 0.55  | 2.72  | 2.41  | 1.50  |

**(E) NP4(D70N)[NO<sub>2</sub><sup>-</sup>]**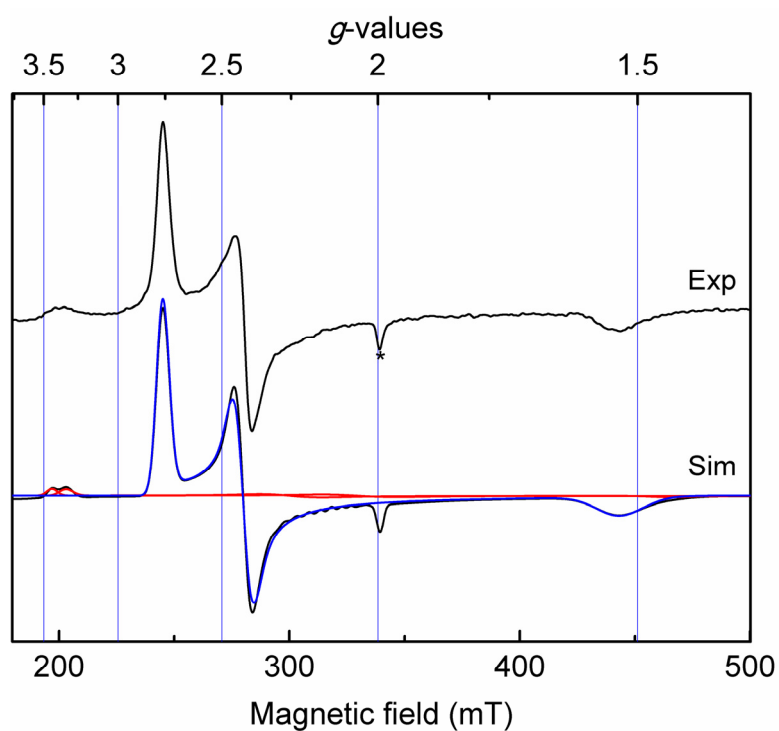

| HALS  |       |       | LS2   |       |       |
|-------|-------|-------|-------|-------|-------|
| $g_1$ | $g_2$ | $g_3$ | $g_1$ | $g_2$ | $g_3$ |
| 3.38  | 2.03  | 0.50  | 2.73  | 2.40  | 1.52  |
| 3.28  | 2.23  | 0.65  |       |       |       |

**(F) NP4(D70V)[NO<sub>2</sub><sup>-</sup>]**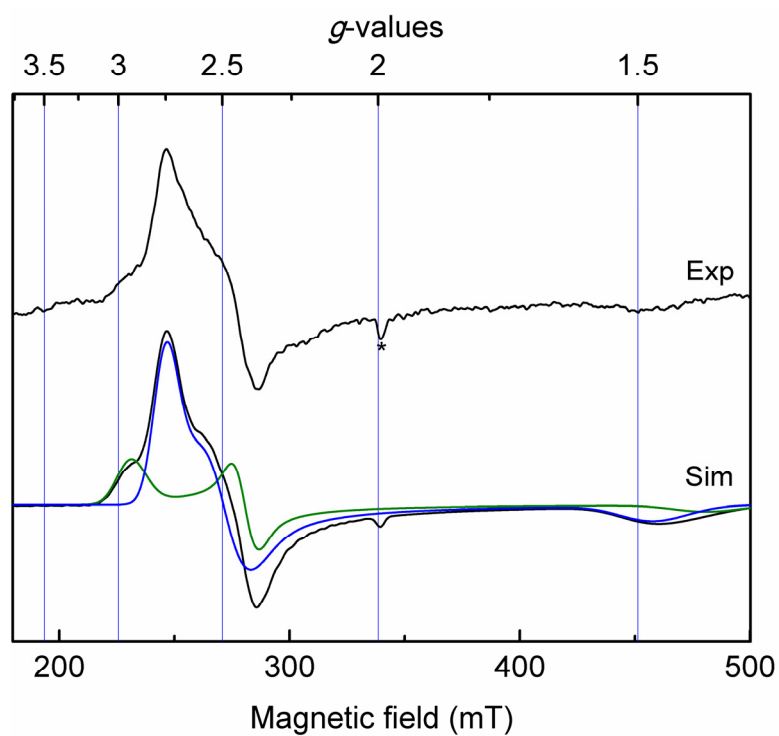

| LS1   |       |       | LS2   |       |       |
|-------|-------|-------|-------|-------|-------|
| $g_1$ | $g_2$ | $g_3$ | $g_1$ | $g_2$ | $g_3$ |
| 2.89  | 2.39  | 1.40  | 2.71  | 2.46  | 1.47  |

**(G) NP4(D70A)[NO<sub>2</sub><sup>-</sup>]**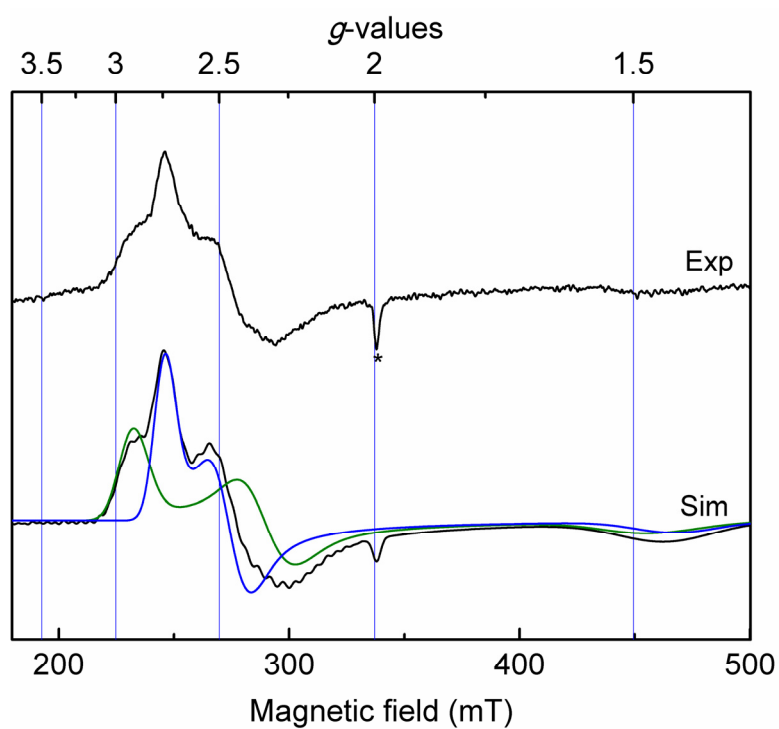

| LS1   |       |       | LS2   |       |       |
|-------|-------|-------|-------|-------|-------|
| $g_1$ | $g_2$ | $g_3$ | $g_1$ | $g_2$ | $g_3$ |
| 2.86  | 2.30  | 1.40  | 2.71  | 2.43  | 1.43  |

**(H) NP7[NO<sub>2</sub><sup>-</sup>]**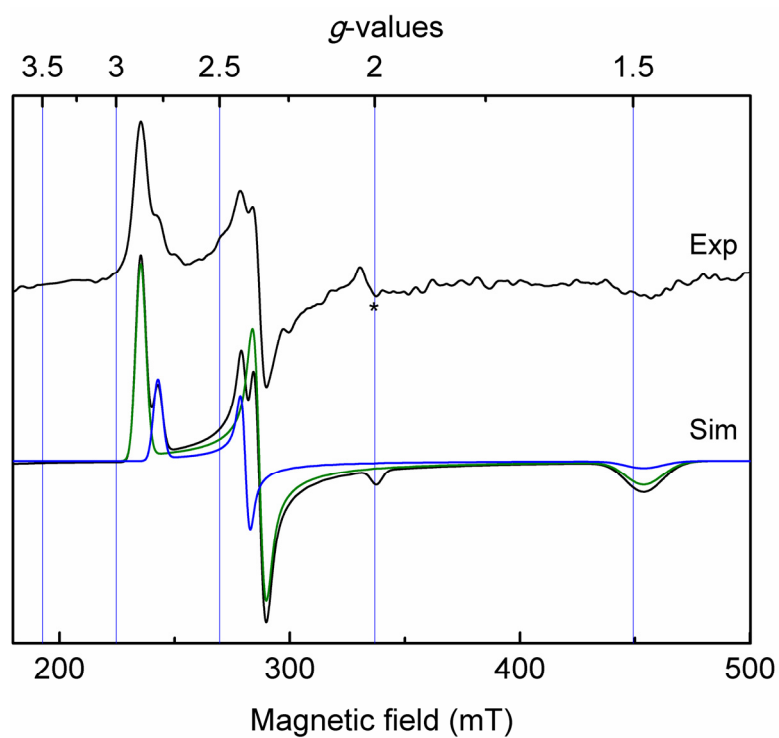

| LS1   |       |       | LS2   |       |       |
|-------|-------|-------|-------|-------|-------|
| $g_1$ | $g_2$ | $g_3$ | $g_1$ | $g_2$ | $g_3$ |
| 2.86  | 2.34  | 1.46  | 2.78  | 2.40  | 1.46  |

(I) NP2[NO<sub>2</sub><sup>-</sup>]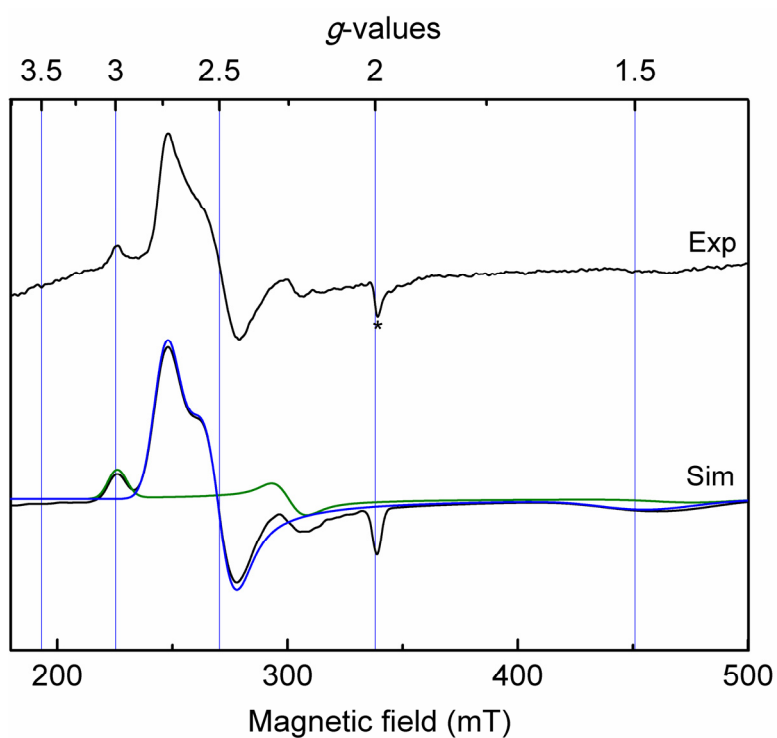

| LS1                   |                       |                       | LS2                   |                       |                       |
|-----------------------|-----------------------|-----------------------|-----------------------|-----------------------|-----------------------|
| <i>g</i> <sub>1</sub> | <i>g</i> <sub>2</sub> | <i>g</i> <sub>3</sub> | <i>g</i> <sub>1</sub> | <i>g</i> <sub>2</sub> | <i>g</i> <sub>3</sub> |
| 2.95                  | 2.23                  | 1.41                  | 2.70                  | 2.48                  | 1.44                  |

(J) NP4[NO<sub>2</sub><sup>-</sup>] at pH 10.5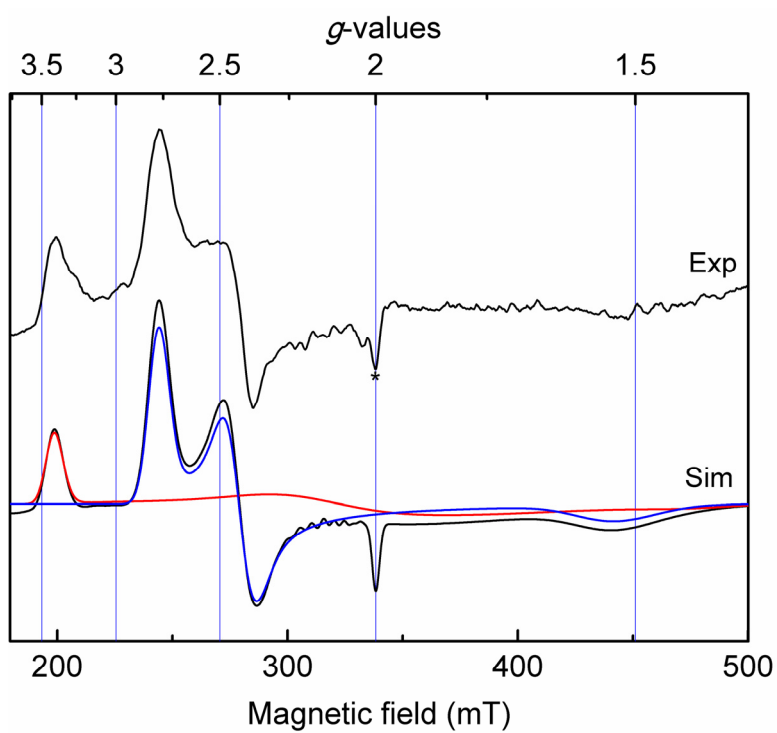

| HALS                  |                       |                       | LS2                   |                       |                       |
|-----------------------|-----------------------|-----------------------|-----------------------|-----------------------|-----------------------|
| <i>g</i> <sub>1</sub> | <i>g</i> <sub>2</sub> | <i>g</i> <sub>3</sub> | <i>g</i> <sub>1</sub> | <i>g</i> <sub>2</sub> | <i>g</i> <sub>3</sub> |
| 3.40                  | 2.05                  | 0.66                  | 2.77                  | 2.42                  | 1.52                  |

**Fig. S3** Possible protonation states of the histidine side-chain.<sup>a</sup>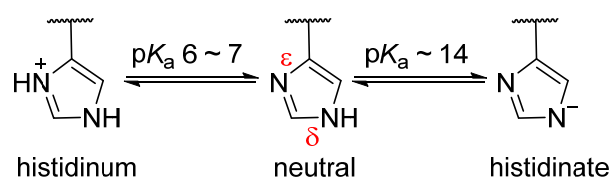

<sup>a</sup>Nomenclature of the N-atoms of the His side-chain are indicated in red,  $pK_a$  values are taken from: A. Barth, *Prog. Biophys. Mol. Biol.*, 2000, **74**, 141.





**Fig. S5** X-ray crystal structure of NP4(D30N) in complex with nitrite, highlighting the active site structure (PDB code: 5HWZ).

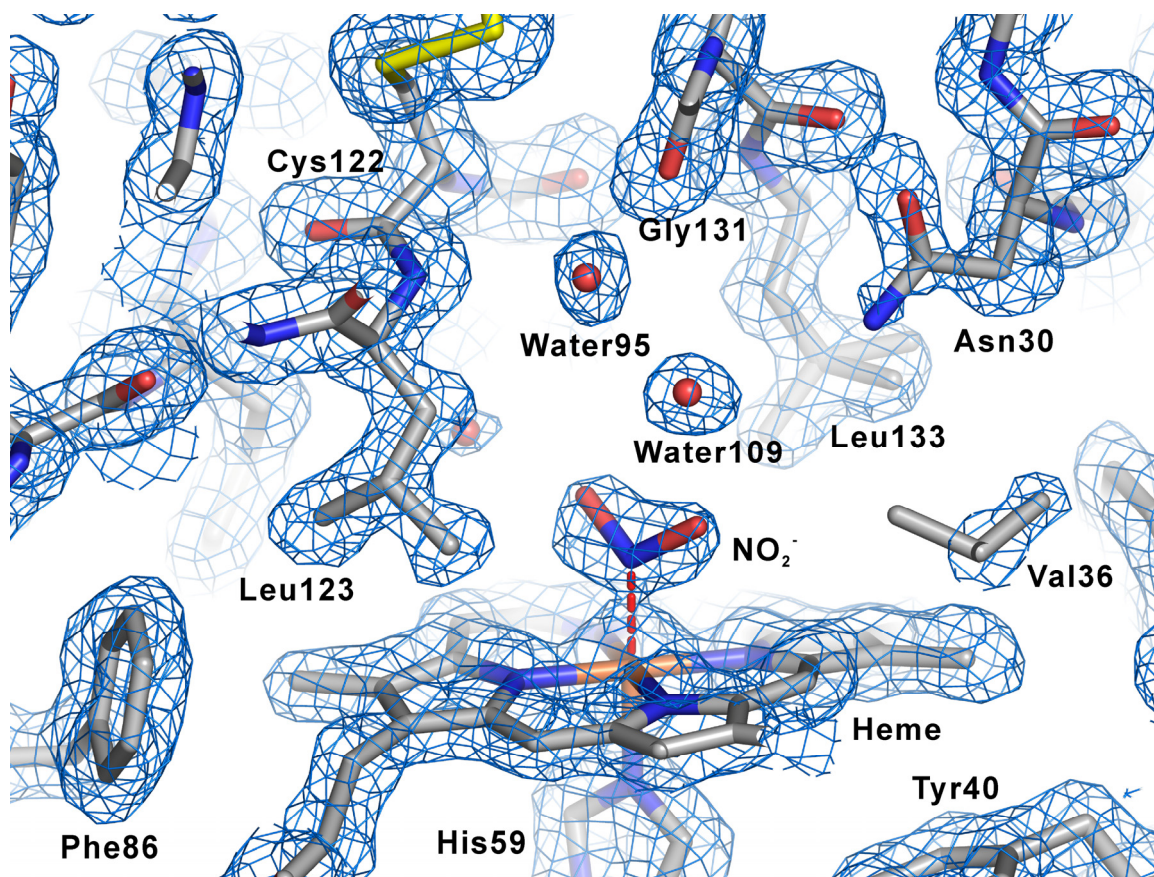

**Fig. S6** Comparison of the distal heme pocket of the nitrite complexes of wt NP4 (A), NP4(L130R) (B), and NP4(D30N) (C). Shown in red dotted lines are the H-bonds with the corresponding distances indicated ( $\text{\AA}$ ).

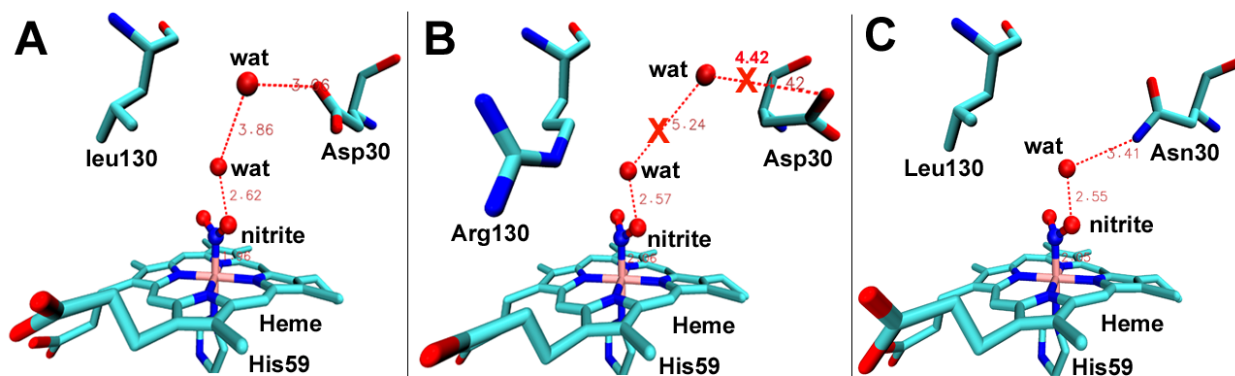

**Fig. S7** UV–vis absorbance changes at 420 nm for the reaction of NP4(D70A) with nitrite at 37 °C, other experimental conditions are the same as described in Fig. 4. The  $k_{\text{obs}}$  is calculated from an exponential fitting (black line).

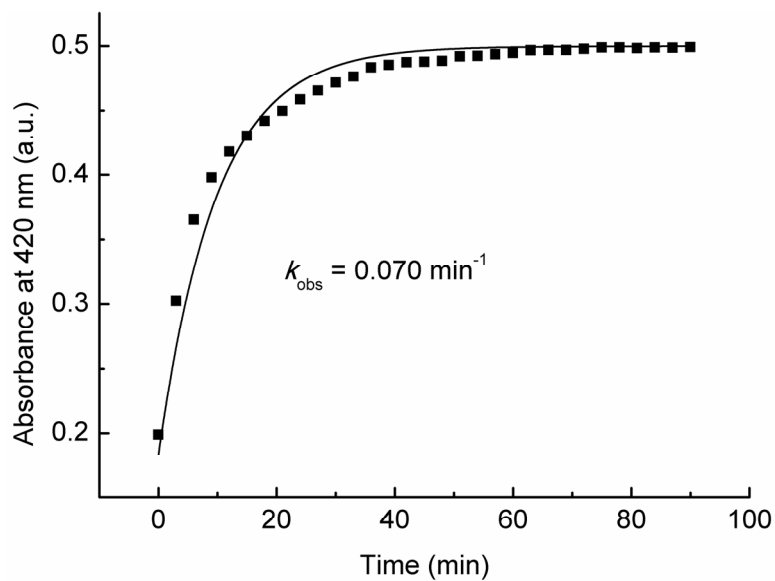

Table S1. Low-spin  $g$ -values of the nitrite complexes of NP4 variants and related heme distortion.

| Protein complex                             | HALS or LS1  |                                    |                                    | LS2   |       |       | Relative spin contribution of HALS <sup>b</sup> | Heme distortion in NP[NH <sub>3</sub> ] complexes |              |
|---------------------------------------------|--------------|------------------------------------|------------------------------------|-------|-------|-------|-------------------------------------------------|---------------------------------------------------|--------------|
|                                             | $g_1$        | $g_2$                              | $g_3$                              | $g_1$ | $g_2$ | $g_3$ |                                                 | RMSD (0.01 Å)                                     | PDB code     |
| NP4[NO <sub>2</sub> <sup>-</sup> ]          | 3.38         | -- <sup>a</sup>                    | -- <sup>a</sup>                    | 2.74  | 2.42  | 1.51  | ≈ 30%                                           | 14.9                                              | 1X8P         |
| NP4[NO <sub>2</sub> <sup>-</sup> ], pH 10.5 | 3.40         | -- <sup>a</sup>                    | -- <sup>a</sup>                    | 2.77  | 2.42  | 1.52  | ≈ 50%                                           | --                                                | --           |
| NP4(L130R) [NO <sub>2</sub> <sup>-</sup> ]  | 3.32         | -- <sup>a</sup>                    | -- <sup>a</sup>                    | 2.70  | 2.42  | 1.49  | ≈ 72%                                           | 14.7                                              | 3TGA         |
| NP4(D30N) [NO <sub>2</sub> <sup>-</sup> ]   | 3.30         | -- <sup>a</sup>                    | -- <sup>a</sup>                    | 2.72  | 2.41  | 1.51  | ≈ 60%                                           | 17.0                                              | 1SXY         |
| NP4(D70N) [NO <sub>2</sub> <sup>-</sup> ]   | 3.38<br>3.28 | -- <sup>a</sup><br>-- <sup>a</sup> | -- <sup>a</sup><br>-- <sup>a</sup> | 2.73  | 2.40  | 1.52  | ≈ 16%                                           | 13.4                                              | <sup>c</sup> |
| NP4(D70A) [NO <sub>2</sub> <sup>-</sup> ]   | 2.86         | 2.30                               | 1.40                               | 2.71  | 2.43  | 1.43  | ≈ 0%                                            | 12.6                                              | <sup>c</sup> |
| NP4(D70V) [NO <sub>2</sub> <sup>-</sup> ]   | 2.89         | 2.39                               | 1.40                               | 2.71  | 2.46  | 1.47  | ≈ 0%                                            | 14.5                                              | <sup>c</sup> |

<sup>a</sup> "Large  $g_{\max}$ " type of spectrum,  $g_2$  and  $g_3$  are not observable; <sup>b</sup> data obtained from spectra simulations; <sup>c</sup> unpublished data

**Table S2. NP4(D30N)[NO<sub>2</sub><sup>-</sup>]: Data collection and refinement statistics**

| NP4(D30N)[NO <sub>2</sub> <sup>-</sup> ] |                              |
|------------------------------------------|------------------------------|
| PDB entry                                | 5HWZ                         |
| <i>Data Collection</i>                   |                              |
| wavelength(Å)                            | 0.91841                      |
| Space group                              | C2                           |
| Unit cell parameters                     |                              |
| <i>a</i> (Å)                             | 69.78                        |
| <i>b</i> (Å)                             | 43.11                        |
| <i>c</i> (Å)                             | 52.62                        |
| β(°)                                     | 94.5                         |
| resolution(Å) <sup>a</sup>               | 26.23-1.45<br>(1.49-1.45)    |
| no. of observed reflections              | 102441                       |
| no. of unique reflections                | 27719                        |
| <i>R</i> <sub>merge</sub> <sup>a</sup>   | 0.040 (0.309)                |
| completeness(%) <sup>a</sup>             | 99.7 (99.5)                  |
| < <i>I</i> /σ( <i>I</i> )> <sup>a</sup>  | 19.5 (4.3)                   |
| <i>Refinement</i>                        |                              |
| resolution range(Å)                      | 26.2-1.45                    |
| <i>R</i> (%)                             | 14.9                         |
| <i>R</i> <sub>free</sub> (%)             | 18.0                         |
| no. of residues                          | 184                          |
| no. of solvent molecules                 | 118                          |
| ligand                                   | NO <sub>2</sub> <sup>-</sup> |
| rmsd <sup>b</sup> for bond lengths(Å)    | 0.006                        |
| rmsd <sup>b</sup> for bond angles(°)     | 1.06                         |
| Ramachandran plot                        |                              |
| favored region(%)                        | 99.5                         |
| allowed region(%)                        | 0.5                          |
| outlierregion(%)                         | 0.0                          |
| average <i>B</i> factor(Å <sup>2</sup> ) |                              |
| protein                                  | 17.1                         |
| ligand(heme)                             | 17.6                         |
| ligand                                   | 24.8                         |
| solvent                                  | 24.5                         |

<sup>a</sup> Numbers in parentheses represent the values for the highest-resolution shell.

<sup>b</sup> Root-mean-square deviation.
